# Supplementary material for: In Situ Synthesis of Silver Nanoparticles in a Hydrogel of Carboxymethyl Cellulose with Phthalated-Cashew Gum as a Promising Antibacterial and Healing Agent
Source: PubMed Central journal article supplement (PMC5713367; doi:10.3390/ijms18112399), 2017-11-12
Supplement: ijms-18-02399-s001.pdf [file ijms-18-02399-s001.pdf]

Supplementary Information

***In situ* synthesis of silver nanoparticles in a hydrogel of carboxymethyl cellulose with phthalated-cashew gum as a promising antibacterial and healing agent**

Ana Karina Marques Fortes Lustosa<sup>1</sup>, Antônia Carla de Jesus Oliveira<sup>1</sup>, Patrick Veras Quelemes<sup>1</sup>, Alexandra Plácido<sup>2</sup>, Francilene Vieira da Silva<sup>3</sup>, Irisdalva Sousa Oliveiera<sup>3</sup>, Miguel Peixoto Almeida<sup>4</sup>, Adriany das Graças Nascimento Amorim<sup>1</sup>, Cristina Delerue-Matos<sup>2</sup>, Peter Eaton<sup>4</sup>, Rita de Cássia Meneses de Oliveira<sup>3</sup>, Durcilene Alves da Silva<sup>1</sup>, José Roberto de Souza de Almeida Leite<sup>5\*</sup>

<sup>1</sup>*Center for Biodiversity Research and Biotechnology, Biotec, Federal University of Piauí, Av. São Sebastião, 2819, Reis Veloso, 64202-020, Parnaíba-PI, Brazil*

<sup>2</sup>*REQUIMTE/LAQV, Superior Engineering Institute of Porto, Polytechnic Institute of Porto, Rua Dr. António Bernardino de Almeida, 431, 4200-072 Porto, Portugal*

<sup>3</sup>*Medicinal Plants Reserarch Center, NPPM, Federal University of Piauí, Campus Ministro Petrônio Portella, Bairro Ininga, 64049-550, Teresina- PI, Brazil*

<sup>4</sup>*REQUIMTE/LAQV, Department of Chemistry and Biochemistry, Faculty of Sciences of the University of Porto, Rua do Campo Alegre, 4169-007 Porto, Portugal*

<sup>5</sup>*Area Morphology, Faculty of Medicine, University of Brasília (UnB), University campus Darcy Ribeiro, Asa Norte, 70910-900, Brasília-DF, Brazil*

## 1. EDS Results.

EDS Spectra were obtained with the electron beam focussed directly on agglomerates of nanoparticles within each AgNP-containing hydrogel. The results below indicate a high weight % of silver in the along with a majority of organic material, and some small contamination with iron and silicon.

Table 1: EDS analysis results from sample of hydrogel containing NCG-AgNPs.

| <b>Element</b> | <b>Peak Area</b> | <b>Weight %</b> | <b>Atomic %</b> |
|----------------|------------------|-----------------|-----------------|
| <b>C</b>       | 29466            | 9.01            | 44.64           |
| <b>O</b>       | 836              | 0.19            | 0.72            |
| <b>Si</b>      | 20527            | 2.59            | 5.49            |
| <b>Fe</b>      | 892              | 0.14            | 0.15            |
| <b>Ag</b>      | 388357           | 87.76           | 48.43           |

Table 2: EDS analysis results from sample of hydrogel containing PhCG-AgNPs.

| <b>Element</b> | <b>Peak Area</b> | <b>Weight %</b> | <b>Atomic %</b> |
|----------------|------------------|-----------------|-----------------|
| <b>C</b>       | 61831            | 54.04           | 81.81           |
| <b>O</b>       | 8791             | 5.79            | 6.58            |
| <b>Si</b>      | 1190             | 0.43            | 0.28            |
| <b>Fe</b>      | 337              | 0.15            | 0.05            |
| <b>Ag</b>      | 46605            | 30.12           | 5.08            |
